# Supplementary material for: Development and Verification of an Autophagy-Related lncRNA Signature to Predict Clinical Outcomes and Therapeutic Responses in Ovarian Cancer
Source: Front Med (Lausanne). 2021 Oct 4;8:715250. doi: 10.3389/fmed.2021.715250 (PMC8521014; doi:10.3389/fmed.2021.715250)
Supplement: Supplementary Table 3 — The correlation analysis results between abnormally expressed lncRNAs and autophagy-related genes. [file Table_3.XLSX]

## Sheet: Sheet1
mRNA	lncRNA	R	p_value
APOL1	AC002306.1	-0.144603	0
ATF4	AC002306.1	-0.146608	0
ATG16L2	AC002306.1	0.301996	0
ATG2A	AC002306.1	0.154586	0
ATG2B	AC002306.1	0.207226	0
ATG4B	AC002306.1	0.274954	0
ATG7	AC002306.1	-0.144375	0
ATG9B	AC002306.1	0.174453	0
BCL2	AC002306.1	0.165164	0
BID	AC002306.1	-0.223771	0
BNIP1	AC002306.1	-0.172312	0
CAMKK2	AC002306.1	0.174484	0
CANX	AC002306.1	-0.155972	0
CAPN10	AC002306.1	0.37387	0
CASP1	AC002306.1	-0.221039	0
CASP4	AC002306.1	-0.251814	0
CFLAR	AC002306.1	0.207752	0
DAPK1	AC002306.1	0.221711	0
EIF2AK3	AC002306.1	0.174242	0
ERN1	AC002306.1	0.156893	0
FAS	AC002306.1	-0.169792	0
GABARAPL2	AC002306.1	-0.17249	0
HDAC6	AC002306.1	0.245231	0
HGS	AC002306.1	0.164979	0
KLHL24	AC002306.1	0.174815	0
LAMP2	AC002306.1	-0.15732	0
MAP2K7	AC002306.1	0.234349	0
MAPK8	AC002306.1	0.187529	0
MAPK8IP1	AC002306.1	0.260034	0
MTOR	AC002306.1	0.164082	0
PARP1	AC002306.1	0.193052	0
PEA15	AC002306.1	-0.156958	0
PELP1	AC002306.1	0.196301	0
RAB11A	AC002306.1	-0.168758	0
RPTOR	AC002306.1	0.160031	0
SERPINA1	AC002306.1	-0.151209	0
SPNS1	AC002306.1	0.201549	0
SQSTM1	AC002306.1	-0.198334	0
TP53INP2	AC002306.1	0.187173	0
TP73	AC002306.1	0.219719	0
TSC1	AC002306.1	0.334407	0
TSC2	AC002306.1	0.197339	0
ULK1	AC002306.1	0.26336	0
ULK2	AC002306.1	0.148887	0
ULK3	AC002306.1	0.157265	0
VEGFA	AC002306.1	0.20181	0
APOL1	AC002451.1	-0.176252	0
ARSB	AC002451.1	-0.247744	0
ATG2B	AC002451.1	-0.149753	0
BAG3	AC002451.1	-0.228626	0
BAX	AC002451.1	-0.14605	0
BCL2	AC002451.1	0.15847	0
CAPN1	AC002451.1	-0.157882	0
CTSD	AC002451.1	-0.165169	0
DRAM1	AC002451.1	-0.229236	0
EDEM1	AC002451.1	-0.163035	0
EIF4G1	AC002451.1	-0.204422	0
ERN1	AC002451.1	-0.174711	0
FAS	AC002451.1	-0.203914	0
FKBP1B	AC002451.1	0.20331	0
GABARAP	AC002451.1	0.166239	0
GABARAPL2	AC002451.1	0.18224	0
HSPA8	AC002451.1	-0.147147	0
ITGB1	AC002451.1	-0.178918	0
ITGB4	AC002451.1	-0.156238	0
ITPR1	AC002451.1	0.257773	0
LAMP1	AC002451.1	-0.218485	0
MAPK9	AC002451.1	-0.169856	0
NPC1	AC002451.1	-0.18415	0
P4HB	AC002451.1	-0.167422	0
PEX14	AC002451.1	0.150381	0
PTK6	AC002451.1	-0.158733	0
SH3GLB1	AC002451.1	-0.176809	0
SPHK1	AC002451.1	-0.25187	0
STK11	AC002451.1	-0.162517	0
TP53INP2	AC002451.1	-0.151655	0
WIPI1	AC002451.1	-0.198456	0
CAPNS1	AC002511.1	0.264239	0
CHMP2B	AC002511.1	0.214873	0
HDAC6	AC002511.1	0.163998	0
IRGM	AC002511.1	0.195733	0
P4HB	AC002511.1	-0.149455	0
PARP1	AC002511.1	0.15572	0
PRKCQ	AC002511.1	0.164835	0
RB1	AC002511.1	0.166186	0
SIRT1	AC002511.1	0.152694	0
ARSA	AC004466.1	0.171554	0
ATF6	AC004466.1	-0.166588	0
ATG16L2	AC004466.1	0.44496	0
ATG2A	AC004466.1	0.155195	0
ATG4B	AC004466.1	0.292225	0
ATG9B	AC004466.1	0.157981	0
BCL2	AC004466.1	0.151778	0
BECN1	AC004466.1	-0.153478	0
BID	AC004466.1	-0.166141	0
BIRC5	AC004466.1	-0.167878	0
BNIP1	AC004466.1	-0.175034	0
CANX	AC004466.1	-0.17314	0
CAPN10	AC004466.1	0.388197	0
CASP3	AC004466.1	-0.16668	0
CASP4	AC004466.1	-0.15186	0
CDKN1B	AC004466.1	-0.200834	0
CFLAR	AC004466.1	0.204716	0
CHMP2B	AC004466.1	-0.147878	0
DNAJB9	AC004466.1	-0.251085	0
EIF2S1	AC004466.1	-0.205234	0
FADD	AC004466.1	-0.156242	0
GABARAPL2	AC004466.1	-0.172475	0
GNAI3	AC004466.1	-0.219375	0
HGS	AC004466.1	0.193733	0
HSPA5	AC004466.1	-0.168372	0
HSPA8	AC004466.1	-0.287667	0
IKBKB	AC004466.1	0.210302	0
ITGB1	AC004466.1	-0.152806	0
ITPR1	AC004466.1	0.223964	0
LAMP2	AC004466.1	-0.173107	0
MAP1LC3B	AC004466.1	-0.237736	0
NRG1	AC004466.1	0.149585	0
PRKCD	AC004466.1	0.148432	0
RAB1A	AC004466.1	-0.224181	0
RAB24	AC004466.1	0.256453	0
RAB33B	AC004466.1	-0.163772	0
ST13	AC004466.1	-0.19346	0
STK11	AC004466.1	0.220874	0
TBK1	AC004466.1	0.159891	0
TSC1	AC004466.1	0.223531	0
TSC2	AC004466.1	0.283707	0
ULK1	AC004466.1	0.165575	0
ULK3	AC004466.1	0.301487	0
USP10	AC004466.1	-0.156248	0
VEGFA	AC004466.1	0.170768	0
ARSA	AC004771.1	0.174437	0
ATG16L2	AC004771.1	0.388429	0
ATG2B	AC004771.1	0.213674	0
CAPN10	AC004771.1	0.169741	0
CCR2	AC004771.1	0.195653	0
CFLAR	AC004771.1	0.31066	0
EDEM1	AC004771.1	0.175557	0
ERN1	AC004771.1	0.267553	0
GABARAPL2	AC004771.1	-0.180151	0
GAPDH	AC004771.1	-0.153083	0
HDAC6	AC004771.1	0.144882	0
IFNG	AC004771.1	0.25418	0
IL24	AC004771.1	0.161746	0
KLHL24	AC004771.1	0.192463	0
MAP1LC3B	AC004771.1	-0.174924	0
MTOR	AC004771.1	0.145326	0
NLRC4	AC004771.1	0.189752	0
PEA15	AC004771.1	-0.169112	0
PELP1	AC004771.1	0.308574	0
RAB1A	AC004771.1	-0.163837	0
RAB24	AC004771.1	0.199913	0
SPHK1	AC004771.1	0.152127	0
TBK1	AC004771.1	0.153918	0
TSC1	AC004771.1	0.204036	0
ULK3	AC004771.1	0.167882	0
VEGFA	AC004771.1	0.161388	0
WDR45	AC004771.1	0.160922	0
WIPI1	AC004771.1	0.167674	0
APOL1	AC004947.2	-0.147539	0
ATG16L1	AC004947.2	0.146426	0
ATG4B	AC004947.2	0.274432	0
BAK1	AC004947.2	-0.178345	0
BCL2	AC004947.2	0.453917	0
BID	AC004947.2	-0.183195	0
BIRC5	AC004947.2	-0.146166	0
BNIP1	AC004947.2	-0.162589	0
CAMKK2	AC004947.2	0.189905	0
CAPN10	AC004947.2	0.404061	0
CASP1	AC004947.2	-0.144958	0
CCL2	AC004947.2	-0.147602	0
CFLAR	AC004947.2	0.147248	0
DRAM1	AC004947.2	-0.172178	0
EIF2S1	AC004947.2	-0.203648	0
FOXO3	AC004947.2	0.174677	0
GOPC	AC004947.2	0.314318	0
GRID2	AC004947.2	0.147229	0
HDAC6	AC004947.2	0.146352	0
HSP90AB1	AC004947.2	0.157109	0
HSPA8	AC004947.2	-0.178626	0
ITPR1	AC004947.2	0.497072	0
KLHL24	AC004947.2	0.157318	0
MAPK8	AC004947.2	0.198806	0
P4HB	AC004947.2	-0.174522	0
PEX14	AC004947.2	0.226315	0
RELA	AC004947.2	-0.157043	0
TSC1	AC004947.2	0.246473	0
TSC2	AC004947.2	0.330529	0
ULK1	AC004947.2	0.241084	0
UVRAG	AC004947.2	0.170992	0
WIPI2	AC004947.2	0.292314	0
APOL1	AC004988.1	0.166498	0
ARSB	AC004988.1	0.207211	0
ATF4	AC004988.1	0.15515	0
ATG12	AC004988.1	0.172399	0
ATG2A	AC004988.1	-0.215849	0
BAK1	AC004988.1	0.14879	0
BAX	AC004988.1	0.190753	0
BIRC5	AC004988.1	0.172732	0
CALCOCO2	AC004988.1	0.151576	0
CAPN1	AC004988.1	-0.153669	0
CASP1	AC004988.1	0.182726	0
CASP3	AC004988.1	0.195841	0
CCL2	AC004988.1	0.21596	0
CCR2	AC004988.1	0.169449	0
CDKN1A	AC004988.1	0.168273	0
DNAJB9	AC004988.1	0.235566	0
DRAM1	AC004988.1	0.340399	0
EEF2	AC004988.1	-0.187092	0
IFNG	AC004988.1	0.30629	0
ITGB1	AC004988.1	0.15086	0
MAPK8IP1	AC004988.1	-0.146206	0
MYC	AC004988.1	-0.148745	0
NKX2-3	AC004988.1	0.222667	0
NLRC4	AC004988.1	0.287512	0
NPC1	AC004988.1	0.148274	0
RAB33B	AC004988.1	0.153735	0
RELA	AC004988.1	-0.161962	0
SPHK1	AC004988.1	0.37386	0
TNFSF10	AC004988.1	0.219522	0
TSC2	AC004988.1	-0.14893	0
WIPI1	AC004988.1	0.292557	0
AMBRA1	AC005034.3	0.148604	0
ARNT	AC005034.3	0.291717	0
ARSA	AC005034.3	-0.249039	0
ATF6	AC005034.3	0.233695	0
ATG2B	AC005034.3	0.199885	0
ATG4B	AC005034.3	0.154548	0
ATG9A	AC005034.3	0.169112	0
BAK1	AC005034.3	-0.230892	0
BAX	AC005034.3	-0.165334	0
BCL2	AC005034.3	0.206788	0
BID	AC005034.3	-0.189424	0
BIRC5	AC005034.3	-0.234815	0
BIRC6	AC005034.3	0.413922	0
BNIP1	AC005034.3	-0.252607	0
CAMKK2	AC005034.3	0.172967	0
CAPN10	AC005034.3	0.244643	0
CASP1	AC005034.3	-0.180947	0
CASP4	AC005034.3	-0.212117	0
CCL2	AC005034.3	-0.1724	0
CDKN1A	AC005034.3	0.179404	0
CDKN2A	AC005034.3	-0.152413	0
CFLAR	AC005034.3	0.188884	0
CLN3	AC005034.3	-0.192842	0
DAPK1	AC005034.3	0.208239	0
DLC1	AC005034.3	0.159831	0
DNAJB1	AC005034.3	0.149555	0
DNAJB9	AC005034.3	-0.14417	0
EGFR	AC005034.3	0.178171	0
EIF2AK2	AC005034.3	0.312907	0
EIF2AK3	AC005034.3	0.351866	0
EIF4G1	AC005034.3	0.16606	0
ERN1	AC005034.3	0.152725	0
FADD	AC005034.3	-0.166145	0
FOXO3	AC005034.3	0.255816	0
GABARAP	AC005034.3	-0.175865	0
GABARAPL2	AC005034.3	-0.158832	0
GAPDH	AC005034.3	-0.16596	0
GOPC	AC005034.3	0.381479	0
HSP90AB1	AC005034.3	0.209564	0
HSPA8	AC005034.3	-0.182014	0
ITPR1	AC005034.3	0.172835	0
KIF5B	AC005034.3	0.212064	0
KLHL24	AC005034.3	0.179759	0
MAP2K7	AC005034.3	0.164538	0
MAPK3	AC005034.3	-0.180093	0
MAPK8	AC005034.3	0.249546	0
MLST8	AC005034.3	-0.170962	0
MTOR	AC005034.3	0.238031	0
NBR1	AC005034.3	0.269669	0
NCKAP1	AC005034.3	0.166094	0
NFE2L2	AC005034.3	0.184579	0
NRG1	AC005034.3	0.152026	0
PARP1	AC005034.3	0.228849	0
PELP1	AC005034.3	0.193322	0
PIK3C3	AC005034.3	0.170328	0
PIK3R4	AC005034.3	0.302824	0
PRKAR1A	AC005034.3	0.251886	0
PTEN	AC005034.3	0.144686	0
RAB5A	AC005034.3	0.168688	0
RAC1	AC005034.3	0.150449	0
RAF1	AC005034.3	0.230403	0
RB1	AC005034.3	0.195867	0
RELA	AC005034.3	-0.197146	0
RHEB	AC005034.3	-0.181224	0
RPS6KB1	AC005034.3	0.184983	0
RPTOR	AC005034.3	0.172225	0
SIRT1	AC005034.3	0.307156	0
SQSTM1	AC005034.3	-0.205218	0
TBK1	AC005034.3	0.235123	0
TP53INP2	AC005034.3	0.156201	0
TP73	AC005034.3	0.239738	0
TSC1	AC005034.3	0.254235	0
TSC2	AC005034.3	0.186742	0
ULK1	AC005034.3	0.190757	0
ULK2	AC005034.3	0.191558	0
USP10	AC005034.3	0.290426	0
WDFY3	AC005034.3	0.258525	0
WIPI2	AC005034.3	0.180074	0
ZFYVE1	AC005034.3	0.170545	0
ATG7	AC005037.1	-0.152219	0
ATIC	AC005037.1	0.274369	0
BIRC5	AC005037.1	0.175055	0
CALCOCO2	AC005037.1	-0.164307	0
CASP1	AC005037.1	-0.145534	0
CASP8	AC005037.1	0.173448	0
FOXO1	AC005037.1	-0.145471	0
ITGA6	AC005037.1	0.147092	0
MAP1LC3C	AC005037.1	0.15656	0
MAPK8	AC005037.1	0.173342	0
MLST8	AC005037.1	0.15002	0
NBR1	AC005037.1	-0.188065	0
NCKAP1	AC005037.1	0.178275	0
PELP1	AC005037.1	0.178692	0
SIRT1	AC005037.1	0.155665	0
USP10	AC005037.1	0.241193	0
ATF6	AC005082.1	0.150739	0
FADD	AC005082.1	0.168204	0
MAPK1	AC005082.1	0.152346	0
P4HB	AC005082.1	0.146678	0
ST13	AC005082.1	0.157503	0
TM9SF1	AC005082.1	0.180388	0
APOL1	AC005083.1	-0.183007	0
ARSB	AC005083.1	-0.178679	0
ATG2A	AC005083.1	-0.210831	0
ATG5	AC005083.1	0.155122	0
BAG3	AC005083.1	-0.217544	0
BAK1	AC005083.1	-0.165652	0
EDEM1	AC005083.1	-0.179545	0
EIF4G1	AC005083.1	-0.196448	0
ERN1	AC005083.1	-0.150709	0
GABARAPL2	AC005083.1	0.237217	0
GNAI3	AC005083.1	-0.154543	0
GRID2	AC005083.1	0.15775	0
HDAC6	AC005083.1	-0.151846	0
HSPA5	AC005083.1	-0.292847	0
HSPA8	AC005083.1	-0.163624	0
ITGA6	AC005083.1	-0.172317	0
MBTPS2	AC005083.1	-0.219078	0
NLRC4	AC005083.1	-0.169997	0
NRG1	AC005083.1	0.168093	0
P4HB	AC005083.1	-0.150741	0
RAB11A	AC005083.1	-0.186932	0
RAC1	AC005083.1	0.176864	0
RPS6KB1	AC005083.1	-0.154839	0
RPTOR	AC005083.1	-0.179363	0
SESN2	AC005083.1	-0.176148	0
SH3GLB1	AC005083.1	-0.156453	0
STK11	AC005083.1	-0.163304	0
TM9SF1	AC005083.1	-0.149569	0
TSC1	AC005083.1	-0.181301	0
VAMP7	AC005083.1	-0.146422	0
ZFYVE1	AC005083.1	-0.175112	0
ATG16L2	AC005224.2	0.195759	0
ATG2B	AC005224.2	0.17421	0
ATG5	AC005224.2	-0.158647	0
ATIC	AC005224.2	-0.16521	0
CALCOCO2	AC005224.2	0.184149	0
CFLAR	AC005224.2	0.194352	0
CX3CL1	AC005224.2	0.208271	0
EDEM1	AC005224.2	0.168442	0
ERN1	AC005224.2	0.231409	0
FADD	AC005224.2	-0.179924	0
FAS	AC005224.2	0.148469	0
GOPC	AC005224.2	0.146584	0
HSPA8	AC005224.2	-0.176085	0
IFNG	AC005224.2	0.229631	0
IL24	AC005224.2	0.220387	0
MLST8	AC005224.2	-0.173786	0
NLRC4	AC005224.2	0.155405	0
SH3GLB1	AC005224.2	0.157151	0
SPHK1	AC005224.2	0.310578	0
TSC1	AC005224.2	0.191502	0
WIPI1	AC005224.2	0.20038	0
ARNT	AC005387.2	0.153816	0
ATG16L1	AC005387.2	0.144437	0
ATG16L2	AC005387.2	0.505271	0
ATG2A	AC005387.2	0.17202	0
ATG2B	AC005387.2	0.252753	0
ATG4B	AC005387.2	0.380071	0
ATG9B	AC005387.2	0.16549	0
BCL2	AC005387.2	0.320235	0
BIRC6	AC005387.2	0.230692	0
BNIP1	AC005387.2	-0.215855	0
BNIP3	AC005387.2	-0.172304	0
CAMKK2	AC005387.2	0.199627	0
CAPN10	AC005387.2	0.407448	0
CFLAR	AC005387.2	0.351095	0
DAPK1	AC005387.2	0.174975	0
EEF2K	AC005387.2	0.166919	0
ERN1	AC005387.2	0.166447	0
FOS	AC005387.2	0.194393	0
GABARAP	AC005387.2	-0.191648	0
GAPDH	AC005387.2	-0.156638	0
GOPC	AC005387.2	0.18662	0
HDAC6	AC005387.2	0.347805	0
HGS	AC005387.2	0.19598	0
IKBKB	AC005387.2	0.235093	0
ITPR1	AC005387.2	0.170179	0
MAP1LC3B	AC005387.2	-0.149588	0
MAP2K7	AC005387.2	0.267119	0
MTOR	AC005387.2	0.145799	0
NLRC4	AC005387.2	0.149026	0
PPP1R15A	AC005387.2	0.187066	0
RAB24	AC005387.2	0.163065	0
RAF1	AC005387.2	0.168522	0
SAR1A	AC005387.2	-0.157821	0
SPNS1	AC005387.2	0.227234	0
TSC1	AC005387.2	0.391091	0
TSC2	AC005387.2	0.241623	0
ULK1	AC005387.2	0.330534	0
ULK3	AC005387.2	0.298719	0
VEGFA	AC005387.2	0.258426	0
WDFY3	AC005387.2	0.179176	0
WDR45	AC005387.2	0.149028	0
ZFYVE1	AC005387.2	0.167647	0
ATF4	AC005498.3	-0.187947	0
ATG2B	AC005498.3	0.14562	0
BAG3	AC005498.3	-0.150915	0
BID	AC005498.3	-0.159515	0
BNIP3L	AC005498.3	0.200969	0
CANX	AC005498.3	-0.193147	0
CAPNS1	AC005498.3	0.269528	0
DIRAS3	AC005498.3	0.170934	0
HDAC6	AC005498.3	0.15159	0
HSPA8	AC005498.3	-0.159314	0
PIK3C3	AC005498.3	0.155886	0
PRKCQ	AC005498.3	0.17151	0
RAB11A	AC005498.3	-0.161292	0
SPHK1	AC005498.3	-0.170774	0
ZFYVE1	AC005498.3	0.171309	0
AMBRA1	AC005562.1	0.209369	0
APOL1	AC005562.1	-0.179895	0
ARNT	AC005562.1	0.34253	0
ARSB	AC005562.1	0.229522	0
ATF6	AC005562.1	0.380117	0
ATG2A	AC005562.1	0.201272	0
ATG2B	AC005562.1	0.245093	0
ATG4A	AC005562.1	0.209024	0
ATG4C	AC005562.1	0.151338	0
ATG5	AC005562.1	0.176477	0
ATG9A	AC005562.1	0.216818	0
BAG1	AC005562.1	-0.14623	0
BECN1	AC005562.1	0.374646	0
BIRC6	AC005562.1	0.310923	0
CALCOCO2	AC005562.1	0.175452	0
CAMKK2	AC005562.1	0.205154	0
CASP3	AC005562.1	0.239782	0
CASP4	AC005562.1	-0.162644	0
CD46	AC005562.1	0.186813	0
CDKN1A	AC005562.1	0.144134	0
CDKN1B	AC005562.1	0.203571	0
CHMP2B	AC005562.1	0.150671	0
CLN3	AC005562.1	-0.162165	0
DAPK1	AC005562.1	0.23457	0
DIRAS3	AC005562.1	0.15923	0
DNAJB1	AC005562.1	0.19679	0
EDEM1	AC005562.1	0.216693	0
EIF2AK2	AC005562.1	0.195687	0
EIF2AK3	AC005562.1	0.388781	0
EIF2S1	AC005562.1	0.179698	0
EIF4G1	AC005562.1	0.230488	0
FOXO3	AC005562.1	0.173261	0
GABARAPL1	AC005562.1	0.193271	0
GNAI3	AC005562.1	0.167299	0
GOPC	AC005562.1	0.178377	0
HDAC1	AC005562.1	0.224266	0
HDAC6	AC005562.1	0.212878	0
HIF1A	AC005562.1	0.213982	0
HSPA5	AC005562.1	0.195808	0
HSPA8	AC005562.1	0.224957	0
ITGA3	AC005562.1	0.169829	0
ITGA6	AC005562.1	0.254652	0
ITGB1	AC005562.1	0.312256	0
KIF5B	AC005562.1	0.274816	0
KLHL24	AC005562.1	0.182547	0
LAMP2	AC005562.1	0.146099	0
MAP1LC3C	AC005562.1	0.162132	0
MAPK1	AC005562.1	0.171753	0
MAPK3	AC005562.1	-0.148458	0
MAPK8	AC005562.1	0.267514	0
MAPK9	AC005562.1	0.190305	0
MBTPS2	AC005562.1	0.22477	0
MTMR14	AC005562.1	0.143922	0
MTOR	AC005562.1	0.348194	0
NAF1	AC005562.1	0.226735	0
NBR1	AC005562.1	0.385337	0
NFE2L2	AC005562.1	0.167054	0
NPC1	AC005562.1	0.22035	0
PARP1	AC005562.1	0.381211	0
PELP1	AC005562.1	0.354943	0
PEX3	AC005562.1	0.170661	0
PIK3C3	AC005562.1	0.225805	0
PIK3R4	AC005562.1	0.335337	0
PINK1	AC005562.1	0.260132	0
PRKAB1	AC005562.1	0.200196	0
PRKAR1A	AC005562.1	0.201895	0
RAB1A	AC005562.1	0.147802	0
RAF1	AC005562.1	0.332653	0
RB1	AC005562.1	0.214673	0
RHEB	AC005562.1	-0.162474	0
RPS6KB1	AC005562.1	0.171474	0
RPTOR	AC005562.1	0.194244	0
SESN2	AC005562.1	0.204086	0
SH3GLB1	AC005562.1	0.164997	0
SIRT1	AC005562.1	0.294958	0
SPNS1	AC005562.1	0.224135	0
TBK1	AC005562.1	0.284217	0
TM9SF1	AC005562.1	0.255829	0
TP53INP2	AC005562.1	0.249266	0
TSC1	AC005562.1	0.243688	0
ULK1	AC005562.1	0.261953	0
ULK2	AC005562.1	0.319723	0
UVRAG	AC005562.1	0.162639	0
WDFY3	AC005562.1	0.226107	0
WIPI1	AC005562.1	0.238537	0
WIPI2	AC005562.1	0.19222	0
ZFYVE1	AC005562.1	0.409842	0
ARNT	AC005785.2	0.213148	0
ATG16L1	AC005785.2	0.201595	0
ATG16L2	AC005785.2	0.429605	0
ATG2B	AC005785.2	0.218994	0
ATG4B	AC005785.2	0.31703	0
ATG7	AC005785.2	-0.182919	0
ATG9B	AC005785.2	0.224877	0
BAG1	AC005785.2	-0.176629	0
BAK1	AC005785.2	-0.160197	0
BAX	AC005785.2	-0.14669	0
BCL2	AC005785.2	0.179739	0
BID	AC005785.2	-0.285126	0
BIRC5	AC005785.2	-0.156424	0
BIRC6	AC005785.2	0.230081	0
BNIP1	AC005785.2	-0.300359	0
CAMKK2	AC005785.2	0.181092	0
CAPN10	AC005785.2	0.393125	0
CASP1	AC005785.2	-0.184951	0
CASP4	AC005785.2	-0.169144	0
CASP8	AC005785.2	0.144483	0
CCL2	AC005785.2	-0.194105	0
CFLAR	AC005785.2	0.351667	0
CLN3	AC005785.2	-0.190455	0
CTSB	AC005785.2	-0.174136	0
CTSD	AC005785.2	-0.258724	0
DNAJB1	AC005785.2	0.328284	0
DRAM1	AC005785.2	-0.181709	0
EIF2AK2	AC005785.2	0.232332	0
EIF2AK3	AC005785.2	0.21769	0
FOXO3	AC005785.2	0.156207	0
GABARAP	AC005785.2	-0.206098	0
GABARAPL2	AC005785.2	-0.232485	0
GOPC	AC005785.2	0.316185	0
HDAC6	AC005785.2	0.238077	0
HSPA8	AC005785.2	-0.206212	0
IKBKB	AC005785.2	0.151186	0
KIF5B	AC005785.2	0.248112	0
KLHL24	AC005785.2	0.184662	0
MAP2K7	AC005785.2	0.30613	0
MAPK3	AC005785.2	-0.203358	0
MAPK8	AC005785.2	0.242516	0
MAPK9	AC005785.2	-0.161615	0
MLST8	AC005785.2	-0.175435	0
MTOR	AC005785.2	0.154406	0
PEA15	AC005785.2	-0.187232	0
PELP1	AC005785.2	0.225102	0
PIK3R4	AC005785.2	0.155868	0
RAF1	AC005785.2	0.177997	0
RB1CC1	AC005785.2	0.169209	0
RELA	AC005785.2	-0.168831	0
SERPINA1	AC005785.2	-0.179384	0
SIRT1	AC005785.2	0.16888	0
SQSTM1	AC005785.2	-0.183363	0
TBK1	AC005785.2	0.176449	0
TP73	AC005785.2	0.16754	0
TSC1	AC005785.2	0.327758	0
TSC2	AC005785.2	0.218511	0
ULK1	AC005785.2	0.202222	0
ULK2	AC005785.2	0.199876	0
ULK3	AC005785.2	0.190234	0
VEGFA	AC005785.2	0.277743	0
WDFY3	AC005785.2	0.144216	0
ATG2A	AC005831.1	0.164858	0
ATG4A	AC005831.1	0.175291	0
BECN1	AC005831.1	0.173858	0
CDKN1B	AC005831.1	0.159745	0
DAPK1	AC005831.1	0.205426	0
DIRAS3	AC005831.1	0.266569	0
DRAM1	AC005831.1	0.195491	0
ERN1	AC005831.1	0.291646	0
GABARAP	AC005831.1	-0.188693	0
GABARAPL2	AC005831.1	-0.164167	0
ITGA6	AC005831.1	0.22514	0
MAPK3	AC005831.1	-0.157156	0
MLST8	AC005831.1	-0.190402	0
MTOR	AC005831.1	0.168657	0
PEA15	AC005831.1	-0.160494	0
PEX3	AC005831.1	0.151019	0
PIK3R4	AC005831.1	0.170364	0
RGS19	AC005831.1	0.192135	0
TBK1	AC005831.1	0.172733	0
TP73	AC005831.1	0.159782	0
AMBRA1	AC005841.1	0.174995	0
APOL1	AC005841.1	-0.174974	0
ARNT	AC005841.1	0.162976	0
ATG16L1	AC005841.1	0.149883	0
ATG16L2	AC005841.1	0.306157	0
ATG2A	AC005841.1	0.174053	0
ATG2B	AC005841.1	0.176005	0
ATG3	AC005841.1	-0.17812	0
ATG4B	AC005841.1	0.332049	0
ATG9A	AC005841.1	0.204104	0
BCL2	AC005841.1	0.329542	0
BID	AC005841.1	-0.150083	0
BIRC6	AC005841.1	0.312909	0
CAMKK2	AC005841.1	0.240273	0
CAPN10	AC005841.1	0.388926	0
CASP1	AC005841.1	-0.150303	0
CASP4	AC005841.1	-0.218323	0
CDKN1B	AC005841.1	0.230919	0
CDKN2A	AC005841.1	-0.163736	0
CFLAR	AC005841.1	0.234736	0
DAPK1	AC005841.1	0.2505	0
EIF2AK3	AC005841.1	0.260785	0
EIF4G1	AC005841.1	0.149622	0
ERN1	AC005841.1	0.327958	0
FOXO3	AC005841.1	0.159455	0
GABARAP	AC005841.1	-0.161133	0
GABARAPL1	AC005841.1	0.186575	0
GABARAPL2	AC005841.1	-0.160746	0
HDAC1	AC005841.1	0.166715	0
HDAC6	AC005841.1	0.179747	0
HGS	AC005841.1	0.229612	0
IKBKB	AC005841.1	0.160503	0
ITPR1	AC005841.1	0.16179	0
MAP2K7	AC005841.1	0.201441	0
MAPK8IP1	AC005841.1	0.204611	0
MTOR	AC005841.1	0.297165	0
PARP1	AC005841.1	0.21671	0
PEA15	AC005841.1	-0.162115	0
PELP1	AC005841.1	0.266041	0
PEX14	AC005841.1	0.145616	0
PIK3C3	AC005841.1	0.156069	0
PRKAB1	AC005841.1	0.178783	0
RAB7A	AC005841.1	-0.187968	0
RAF1	AC005841.1	0.165813	0
RGS19	AC005841.1	-0.147378	0
RPS6KB1	AC005841.1	0.189465	0
RPTOR	AC005841.1	0.200554	0
SIRT1	AC005841.1	0.158624	0
SPNS1	AC005841.1	0.256806	0
TNFSF10	AC005841.1	-0.168032	0
TP73	AC005841.1	0.154214	0
TSC1	AC005841.1	0.374904	0
TSC2	AC005841.1	0.201232	0
ULK1	AC005841.1	0.364199	0
ULK2	AC005841.1	0.165123	0
ULK3	AC005841.1	0.284318	0
VAMP7	AC005841.1	-0.148335	0
VEGFA	AC005841.1	0.151269	0
WDFY3	AC005841.1	0.172153	0
WIPI2	AC005841.1	0.184649	0
APOL1	AC006272.1	0.206854	0
ARSB	AC006272.1	0.277636	0
ATG16L2	AC006272.1	0.240951	0
ATG2B	AC006272.1	0.187424	0
ATIC	AC006272.1	-0.169103	0
BAG3	AC006272.1	0.153887	0
BNIP1	AC006272.1	-0.164693	0
BNIP3	AC006272.1	-0.146321	0
CALCOCO2	AC006272.1	0.147545	0
CASP1	AC006272.1	0.221815	0
CCR2	AC006272.1	0.203927	0
CFLAR	AC006272.1	0.17239	0
CTSD	AC006272.1	0.148101	0
DLC1	AC006272.1	0.144105	0
DRAM1	AC006272.1	0.304069	0
EDEM1	AC006272.1	0.22064	0
ERN1	AC006272.1	0.214429	0
FAS	AC006272.1	0.199835	0
FKBP1B	AC006272.1	-0.157559	0
FOXO1	AC006272.1	0.14749	0
GAA	AC006272.1	0.1889	0
IFNG	AC006272.1	0.302204	0
IKBKE	AC006272.1	0.169706	0
IL24	AC006272.1	0.182299	0
MLST8	AC006272.1	-0.191097	0
NFKB1	AC006272.1	0.26914	0
NLRC4	AC006272.1	0.410475	0
PPP1R15A	AC006272.1	0.154032	0
SH3GLB1	AC006272.1	0.183164	0
SPHK1	AC006272.1	0.384512	0
TSC1	AC006272.1	0.17644	0
WIPI1	AC006272.1	0.177504	0
ATG16L2	AC006538.1	0.247781	0
ATG2A	AC006538.1	0.223805	0
ATG4B	AC006538.1	0.198042	0
ATG4D	AC006538.1	0.205971	0
ATG9B	AC006538.1	0.163926	0
BAK1	AC006538.1	0.204684	0
BIRC5	AC006538.1	0.277698	0
CAPN10	AC006538.1	0.249964	0
CDKN2A	AC006538.1	0.221682	0
CLN3	AC006538.1	0.145299	0
CTSD	AC006538.1	0.183878	0
DNAJB9	AC006538.1	-0.181218	0
EEF2	AC006538.1	0.242879	0
EIF4EBP1	AC006538.1	0.153003	0
EIF4G1	AC006538.1	0.203847	0
FAS	AC006538.1	-0.160691	0
HGS	AC006538.1	0.302072	0
MAP1LC3A	AC006538.1	0.154846	0
MAP2K7	AC006538.1	0.209465	0
MAPK8IP1	AC006538.1	0.154931	0
MYC	AC006538.1	0.175549	0
PARP1	AC006538.1	0.161381	0
PELP1	AC006538.1	0.243266	0
PTEN	AC006538.1	-0.200814	0
RAB33B	AC006538.1	-0.166837	0
RELA	AC006538.1	0.232979	0
RPTOR	AC006538.1	0.200478	0
SPNS1	AC006538.1	0.251867	0
STK11	AC006538.1	0.579634	0
TSC1	AC006538.1	0.246371	0
ULK3	AC006538.1	0.214269	0
AMBRA1	AC007009.1	-0.208242	0
ARNT	AC007009.1	-0.182381	0
ARSB	AC007009.1	-0.268516	0
ATG2A	AC007009.1	-0.235644	0
ATG2B	AC007009.1	-0.237206	0
ATG4B	AC007009.1	-0.171868	0
ATG4C	AC007009.1	-0.191521	0
ATG9A	AC007009.1	-0.215709	0
BAK1	AC007009.1	-0.153284	0
BECN1	AC007009.1	-0.285396	0
BID	AC007009.1	0.192617	0
BIRC6	AC007009.1	-0.226069	0
CALCOCO2	AC007009.1	-0.150415	0
CAMKK2	AC007009.1	-0.263983	0
CAPN10	AC007009.1	-0.167078	0
CCL2	AC007009.1	0.168784	0
CTSD	AC007009.1	-0.147104	0
DAPK1	AC007009.1	-0.155375	0
DLC1	AC007009.1	-0.168468	0
DRAM1	AC007009.1	-0.220045	0
EDEM1	AC007009.1	-0.228617	0
EIF4G1	AC007009.1	-0.368934	0
ERN1	AC007009.1	-0.227429	0
FOXO3	AC007009.1	-0.195982	0
GAA	AC007009.1	-0.150417	0
GABARAP	AC007009.1	0.217851	0
GABARAPL2	AC007009.1	0.22707	0
GNAI3	AC007009.1	-0.179513	0
GOPC	AC007009.1	-0.148178	0
HDAC6	AC007009.1	-0.148788	0
HGS	AC007009.1	-0.229719	0
HSPA8	AC007009.1	-0.215541	0
IKBKB	AC007009.1	-0.146726	0
ITGB1	AC007009.1	-0.180208	0
MAPK9	AC007009.1	-0.154407	0
MTOR	AC007009.1	-0.262949	0
NBR1	AC007009.1	-0.239035	0
NLRC4	AC007009.1	-0.217334	0
NPC1	AC007009.1	-0.169318	0
PARP1	AC007009.1	-0.228018	0
PIK3R4	AC007009.1	-0.207748	0
PINK1	AC007009.1	-0.169766	0
PRKAB1	AC007009.1	-0.194205	0
RAB33B	AC007009.1	0.240681	0
RAC1	AC007009.1	0.335782	0
RAF1	AC007009.1	-0.260417	0
RPS6KB1	AC007009.1	-0.175095	0
RPTOR	AC007009.1	-0.241564	0
SESN2	AC007009.1	-0.163154	0
SIRT1	AC007009.1	-0.203876	0
SPHK1	AC007009.1	-0.186793	0
SPNS1	AC007009.1	-0.300613	0
STK11	AC007009.1	-0.17872	0
TBK1	AC007009.1	-0.222113	0
TM9SF1	AC007009.1	-0.172667	0
TP53INP2	AC007009.1	-0.177472	0
TSC1	AC007009.1	-0.288452	0
TSC2	AC007009.1	-0.182597	0
ULK1	AC007009.1	-0.312347	0
WDFY3	AC007009.1	-0.170642	0
WIPI1	AC007009.1	-0.154202	0
WIPI2	AC007009.1	0.196425	0
ZFYVE1	AC007009.1	-0.24872	0
ATG16L2	AC007292.1	0.395142	0
ATG2A	AC007292.1	0.153923	0
ATG4B	AC007292.1	0.338906	0
ATG4D	AC007292.1	0.18042	0
BCL2	AC007292.1	0.313095	0
BID	AC007292.1	-0.156753	0
BNIP1	AC007292.1	-0.22158	0
BNIP3	AC007292.1	-0.161968	0
CANX	AC007292.1	-0.269705	0
CAPN10	AC007292.1	0.413917	0
CASP1	AC007292.1	-0.161561	0
CASP4	AC007292.1	-0.177602	0
CFLAR	AC007292.1	0.254007	0
DNAJB9	AC007292.1	-0.181935	0
DRAM1	AC007292.1	-0.159597	0
EIF2S1	AC007292.1	-0.178242	0
FADD	AC007292.1	-0.159057	0
FAS	AC007292.1	-0.170212	0
HDAC6	AC007292.1	0.172301	0
HSPA8	AC007292.1	-0.278006	0
IKBKB	AC007292.1	0.182724	0
ITPR1	AC007292.1	0.206661	0
MAP2K7	AC007292.1	0.280421	0
MAPK8IP1	AC007292.1	0.168976	0
MAPK9	AC007292.1	-0.314152	0
MBTPS2	AC007292.1	-0.148358	0
PELP1	AC007292.1	0.167791	0
PEX14	AC007292.1	0.211654	0
PRKCD	AC007292.1	0.154387	0
RAB24	AC007292.1	0.198069	0
SAR1A	AC007292.1	-0.215901	0
SH3GLB1	AC007292.1	-0.147522	0
SPNS1	AC007292.1	0.18343	0
ST13	AC007292.1	-0.144505	0
STK11	AC007292.1	0.302806	0
TSC1	AC007292.1	0.279632	0
TSC2	AC007292.1	0.289919	0
ULK1	AC007292.1	0.219463	0
ULK3	AC007292.1	0.235102	0
VAMP3	AC007292.1	-0.156437	0
VEGFA	AC007292.1	0.173078	0
ARNT	AC007292.3	0.145489	0
ATG16L2	AC007292.3	0.445827	0
ATG2A	AC007292.3	0.287704	0
ATG2B	AC007292.3	0.200001	0
ATG4B	AC007292.3	0.384977	0
ATG9A	AC007292.3	0.215394	0
BCL2	AC007292.3	0.508929	0
BID	AC007292.3	-0.157922	0
BNIP1	AC007292.3	-0.203666	0
CAMKK2	AC007292.3	0.217992	0
CAPN10	AC007292.3	0.455343	0
CAPN2	AC007292.3	0.147178	0
CFLAR	AC007292.3	0.36432	0
EIF4G1	AC007292.3	0.177824	0
ERN1	AC007292.3	0.149967	0
FOXO3	AC007292.3	0.167305	0
GABARAP	AC007292.3	-0.169489	0
GAPDH	AC007292.3	-0.18282	0
GOPC	AC007292.3	0.258141	0
HDAC6	AC007292.3	0.18789	0
HGS	AC007292.3	0.172563	0
IKBKB	AC007292.3	0.241778	0
ITPR1	AC007292.3	0.395288	0
KIF5B	AC007292.3	0.187565	0
MAP2K7	AC007292.3	0.195211	0
PELP1	AC007292.3	0.15376	0
RPTOR	AC007292.3	0.1814	0
SPNS1	AC007292.3	0.155779	0
STK11	AC007292.3	0.251829	0
TBK1	AC007292.3	0.176558	0
TSC1	AC007292.3	0.433468	0
TSC2	AC007292.3	0.242619	0
ULK1	AC007292.3	0.315548	0
ULK2	AC007292.3	0.164686	0
ULK3	AC007292.3	0.292183	0
VEGFA	AC007292.3	0.325585	0
WDFY3	AC007292.3	0.179956	0
ZFYVE1	AC007292.3	0.152636	0
ARSA	AC007362.1	0.200967	0
ARSB	AC007362.1	0.162985	0
ATG16L1	AC007362.1	0.150127	0
ATG16L2	AC007362.1	0.316033	0
ATG2A	AC007362.1	0.329834	0
ATG2B	AC007362.1	0.378462	0
ATG3	AC007362.1	-0.169083	0
ATG4B	AC007362.1	0.158932	0
ATG5	AC007362.1	-0.204582	0
ATG7	AC007362.1	0.157823	0
ATG9A	AC007362.1	0.150447	0
BAG3	AC007362.1	0.156316	0
BIRC5	AC007362.1	-0.161701	0
BIRC6	AC007362.1	0.170139	0
BNIP1	AC007362.1	-0.238696	0
BNIP3	AC007362.1	-0.176696	0
CAMKK2	AC007362.1	0.19611	0
CAPN1	AC007362.1	0.207548	0
CAPN10	AC007362.1	0.172065	0
CAPN2	AC007362.1	0.241522	0
CDKN1B	AC007362.1	-0.174894	0
CDKN2A	AC007362.1	-0.168015	0
CFLAR	AC007362.1	0.281324	0
DAPK1	AC007362.1	0.175846	0
DAPK2	AC007362.1	0.219313	0
DLC1	AC007362.1	0.180575	0
EDEM1	AC007362.1	0.360561	0
EEF2K	AC007362.1	0.264869	0
EIF4EBP1	AC007362.1	-0.209228	0
EIF4G1	AC007362.1	0.23824	0
ERN1	AC007362.1	0.237125	0
FAS	AC007362.1	0.180283	0
FKBP1B	AC007362.1	-0.209352	0
FOS	AC007362.1	0.191555	0
GABARAP	AC007362.1	-0.249341	0
GABARAPL2	AC007362.1	-0.204496	0
GAPDH	AC007362.1	-0.225089	0
HDAC6	AC007362.1	0.144683	0
HGS	AC007362.1	0.173729	0
IKBKB	AC007362.1	0.182242	0
ITGB4	AC007362.1	0.195847	0
ITPR1	AC007362.1	0.166205	0
NFKB1	AC007362.1	0.199647	0
NPC1	AC007362.1	0.176252	0
PEX3	AC007362.1	-0.197489	0
PPP1R15A	AC007362.1	0.224745	0
PTEN	AC007362.1	0.144233	0
RAB33B	AC007362.1	-0.169273	0
RAB5A	AC007362.1	0.212333	0
RAC1	AC007362.1	-0.148757	0
RAF1	AC007362.1	0.167576	0
RELA	AC007362.1	0.145056	0
RHEB	AC007362.1	-0.183442	0
RPTOR	AC007362.1	0.174607	0
SH3GLB1	AC007362.1	0.20135	0
SPHK1	AC007362.1	0.157785	0
STK11	AC007362.1	0.171641	0
TSC1	AC007362.1	0.328961	0
ULK1	AC007362.1	0.158485	0
ULK3	AC007362.1	0.145423	0
VEGFA	AC007362.1	0.162822	0
WDFY3	AC007362.1	0.27623	0
ZFYVE1	AC007362.1	0.145258	0
AMBRA1	AC007382.1	0.190449	0
ARNT	AC007382.1	0.377323	0
ATF6	AC007382.1	0.174116	0
ATG16L2	AC007382.1	0.21924	0
ATG2A	AC007382.1	0.279671	0
ATG2B	AC007382.1	0.302183	0
ATG9A	AC007382.1	0.240389	0
BCL2L1	AC007382.1	0.157926	0
BECN1	AC007382.1	0.261491	0
BID	AC007382.1	-0.1514	0
BIRC6	AC007382.1	0.504077	0
BNIP1	AC007382.1	-0.251062	0
CAMKK2	AC007382.1	0.240677	0
CAPN10	AC007382.1	0.149931	0
CFLAR	AC007382.1	0.26614	0
DAPK1	AC007382.1	0.179509	0
EDEM1	AC007382.1	0.227857	0
EEF2K	AC007382.1	0.162437	0
EGFR	AC007382.1	0.148868	0
EIF2AK2	AC007382.1	0.238204	0
EIF2AK3	AC007382.1	0.304493	0
EIF4EBP1	AC007382.1	-0.153898	0
EIF4G1	AC007382.1	0.349378	0
ERN1	AC007382.1	0.262106	0
FOXO1	AC007382.1	0.195477	0
FOXO3	AC007382.1	0.269226	0
GABARAP	AC007382.1	-0.161381	0
GABARAPL2	AC007382.1	-0.255296	0
GAPDH	AC007382.1	-0.277097	0
GNAI3	AC007382.1	0.144491	0
GOPC	AC007382.1	0.185379	0
HDAC6	AC007382.1	0.166197	0
HGS	AC007382.1	0.246714	0
IKBKB	AC007382.1	0.302231	0
ITGB1	AC007382.1	0.193853	0
KLHL24	AC007382.1	0.313279	0
LAMP1	AC007382.1	0.174771	0
MAP2K7	AC007382.1	0.299822	0
MTOR	AC007382.1	0.306191	0
NBR1	AC007382.1	0.335605	0
NFKB1	AC007382.1	0.161777	0
NLRC4	AC007382.1	0.162203	0
NPC1	AC007382.1	0.18285	0
PARP1	AC007382.1	0.278427	0
PELP1	AC007382.1	0.178644	0
PIK3C3	AC007382.1	0.240586	0
PIK3R4	AC007382.1	0.360724	0
PRKAB1	AC007382.1	0.203889	0
PRKAR1A	AC007382.1	0.228395	0
RAB7A	AC007382.1	0.145834	0
RAF1	AC007382.1	0.219278	0
RB1	AC007382.1	0.284763	0
RELA	AC007382.1	0.155641	0
RHEB	AC007382.1	-0.226847	0
RPS6KB1	AC007382.1	0.227051	0
RPTOR	AC007382.1	0.24379	0
SH3GLB1	AC007382.1	0.195669	0
SIRT1	AC007382.1	0.245074	0
STK11	AC007382.1	0.165343	0
TBK1	AC007382.1	0.224409	0
TP53INP2	AC007382.1	0.196124	0
TP73	AC007382.1	0.180677	0
TSC1	AC007382.1	0.417346	0
TSC2	AC007382.1	0.264405	0
ULK1	AC007382.1	0.305663	0
ULK3	AC007382.1	0.188531	0
VEGFA	AC007382.1	0.192707	0
WDFY3	AC007382.1	0.271225	0
ZFYVE1	AC007382.1	0.232065	0
ARSB	AC007389.3	-0.200139	0
ATF6	AC007389.3	-0.17689	0
ATG16L2	AC007389.3	0.16712	0
ATG4A	AC007389.3	-0.178738	0
DAPK1	AC007389.3	-0.156229	0
GABARAPL1	AC007389.3	-0.157243	0
HIF1A	AC007389.3	-0.206072	0
MAPK9	AC007389.3	-0.152728	0
PELP1	AC007389.3	0.171992	0
PEX14	AC007389.3	0.146347	0
SH3GLB1	AC007389.3	-0.172933	0
AMBRA1	AC007563.3	-0.193655	0
APOL1	AC007563.3	-0.203961	0
ARNT	AC007563.3	-0.232349	0
ARSB	AC007563.3	-0.331409	0
ATF6	AC007563.3	-0.219139	0
ATG10	AC007563.3	0.151194	0
ATG2A	AC007563.3	-0.309212	0
ATG2B	AC007563.3	-0.31559	0
ATG4A	AC007563.3	-0.271472	0
ATG5	AC007563.3	0.189395	0
ATG7	AC007563.3	-0.190295	0
ATG9A	AC007563.3	-0.208509	0
BAG3	AC007563.3	-0.241904	0
BAK1	AC007563.3	-0.203936	0
BAX	AC007563.3	-0.199401	0
BECN1	AC007563.3	-0.390448	0
BIRC6	AC007563.3	-0.216048	0
BNIP1	AC007563.3	0.191384	0
CAMKK2	AC007563.3	-0.24468	0
CANX	AC007563.3	-0.222262	0
CAPN1	AC007563.3	-0.23173	0
CASP1	AC007563.3	-0.162584	0
CASP3	AC007563.3	-0.204117	0
CDKN1A	AC007563.3	-0.168964	0
CFLAR	AC007563.3	-0.235347	0
CTSD	AC007563.3	-0.157543	0
DAPK1	AC007563.3	-0.146849	0
DDIT3	AC007563.3	0.148758	0
DRAM1	AC007563.3	-0.288586	0
EDEM1	AC007563.3	-0.421434	0
EEF2K	AC007563.3	-0.244063	0
EGFR	AC007563.3	-0.166775	0
EIF2AK2	AC007563.3	-0.208869	0
EIF4EBP1	AC007563.3	0.187655	0
EIF4G1	AC007563.3	-0.434642	0
ERN1	AC007563.3	-0.307643	0
FAS	AC007563.3	-0.15819	0
FKBP1B	AC007563.3	0.236634	0
FOXO1	AC007563.3	-0.211639	0
FOXO3	AC007563.3	-0.154861	0
GAA	AC007563.3	-0.191964	0
GABARAP	AC007563.3	0.305902	0
GABARAPL2	AC007563.3	0.182683	0
GAPDH	AC007563.3	0.281321	0
GNAI3	AC007563.3	-0.246878	0
HDAC6	AC007563.3	-0.179042	0
HGS	AC007563.3	-0.188162	0
HIF1A	AC007563.3	-0.304553	0
HSPA5	AC007563.3	-0.278339	0
HSPA8	AC007563.3	-0.285662	0
IFNG	AC007563.3	-0.150574	0
IKBKB	AC007563.3	-0.151442	0
IKBKE	AC007563.3	-0.179976	0
ITGB1	AC007563.3	-0.379646	0
ITGB4	AC007563.3	-0.16779	0
KIF5B	AC007563.3	-0.152135	0
KLHL24	AC007563.3	-0.166532	0
LAMP1	AC007563.3	-0.176916	0
LAMP2	AC007563.3	-0.171264	0
MAP2K7	AC007563.3	-0.156144	0
MAPK1	AC007563.3	-0.303294	0
MAPK9	AC007563.3	-0.253052	0
MBTPS2	AC007563.3	-0.276234	0
MTOR	AC007563.3	-0.338319	0
NAF1	AC007563.3	-0.240157	0
NAMPT	AC007563.3	-0.144836	0
NBR1	AC007563.3	-0.31116	0
NFKB1	AC007563.3	-0.290448	0
NLRC4	AC007563.3	-0.248159	0
NPC1	AC007563.3	-0.184869	0
P4HB	AC007563.3	-0.221819	0
PARP1	AC007563.3	-0.175809	0
PIK3R4	AC007563.3	-0.24089	0
PINK1	AC007563.3	-0.251227	0
PRKAR1A	AC007563.3	-0.208808	0
RAB5A	AC007563.3	-0.2655	0
RAB7A	AC007563.3	-0.280832	0
RAF1	AC007563.3	-0.227431	0
RB1	AC007563.3	-0.200369	0
RELA	AC007563.3	-0.233265	0
RPS6KB1	AC007563.3	-0.22569	0
RPTOR	AC007563.3	-0.266145	0
SESN2	AC007563.3	-0.270633	0
SH3GLB1	AC007563.3	-0.335616	0
SPHK1	AC007563.3	-0.217434	0
SPNS1	AC007563.3	-0.15227	0
TBK1	AC007563.3	-0.299277	0
TM9SF1	AC007563.3	-0.236896	0
TP53INP2	AC007563.3	-0.262461	0
TSC1	AC007563.3	-0.234439	0
ULK1	AC007563.3	-0.184198	0
VAMP3	AC007563.3	-0.24921	0
VAMP7	AC007563.3	-0.258836	0
VEGFA	AC007563.3	-0.23891	0
WDFY3	AC007563.3	-0.240081	0
WIPI1	AC007563.3	-0.334903	0
ZFYVE1	AC007563.3	-0.310424	0
ATG16L2	AC007620.3	0.14506	0
ATG7	AC007620.3	-0.146615	0
BCL2L1	AC007620.3	0.16206	0
CFLAR	AC007620.3	0.152006	0
EIF2AK3	AC007620.3	0.164781	0
FADD	AC007620.3	-0.2055	0
FOXO3	AC007620.3	0.221001	0
GAPDH	AC007620.3	-0.206307	0
HSPA8	AC007620.3	-0.152449	0
KLHL24	AC007620.3	0.458021	0
MAP2K7	AC007620.3	0.201302	0
NRG3	AC007620.3	0.163347	0
RAB7A	AC007620.3	0.191681	0
TP53INP2	AC007620.3	0.176952	0
TSC1	AC007620.3	0.231462	0
AMBRA1	AC007787.2	0.237735	0
ARNT	AC007787.2	0.328182	0
ATG16L1	AC007787.2	0.191563	0
ATG16L2	AC007787.2	0.459738	0
ATG2A	AC007787.2	0.32289	0
ATG2B	AC007787.2	0.306428	0
ATG4B	AC007787.2	0.301042	0
ATG4D	AC007787.2	0.152431	0
ATG5	AC007787.2	-0.174555	0
ATG9A	AC007787.2	0.198058	0
BCL2	AC007787.2	0.263329	0
BECN1	AC007787.2	0.161415	0
BID	AC007787.2	-0.206089	0
BIRC5	AC007787.2	-0.208643	0
BIRC6	AC007787.2	0.267856	0
BNIP1	AC007787.2	-0.284927	0
CAMKK2	AC007787.2	0.253935	0
CAPN10	AC007787.2	0.404693	0
CAPN2	AC007787.2	0.235929	0
CAPNS1	AC007787.2	-0.19167	0
CFLAR	AC007787.2	0.339433	0
CHMP4B	AC007787.2	-0.166813	0
DNAJB1	AC007787.2	0.229379	0
EDEM1	AC007787.2	0.18616	0
EEF2K	AC007787.2	0.23461	0
EIF2AK3	AC007787.2	0.146392	0
EIF2S1	AC007787.2	-0.145009	0
EIF4EBP1	AC007787.2	-0.178948	0
EIF4G1	AC007787.2	0.215294	0
ERN1	AC007787.2	0.226974	0
FOXO3	AC007787.2	0.167464	0
GABARAP	AC007787.2	-0.181102	0
GABARAPL2	AC007787.2	-0.220827	0
GAPDH	AC007787.2	-0.17925	0
GOPC	AC007787.2	0.339901	0
GRID2	AC007787.2	0.153003	0
HDAC6	AC007787.2	0.254473	0
HGS	AC007787.2	0.182791	0
IKBKB	AC007787.2	0.243101	0
ITGB4	AC007787.2	0.228507	0
ITPR1	AC007787.2	0.26682	0
KIF5B	AC007787.2	0.319162	0
MAP2K7	AC007787.2	0.305176	0
MTOR	AC007787.2	0.233056	0
MYC	AC007787.2	0.17783	0
NBR1	AC007787.2	0.277638	0
P4HB	AC007787.2	-0.156223	0
PARP1	AC007787.2	0.175379	0
PELP1	AC007787.2	0.203701	0
PIK3R4	AC007787.2	0.247929	0
PRKCD	AC007787.2	0.169666	0
RAB11A	AC007787.2	-0.145525	0
RAB1A	AC007787.2	-0.178583	0
RAF1	AC007787.2	0.304379	0
RB1	AC007787.2	0.181557	0
RHEB	AC007787.2	-0.171226	0
RPTOR	AC007787.2	0.176235	0
SIRT1	AC007787.2	0.149758	0
SPNS1	AC007787.2	0.195029	0
ST13	AC007787.2	-0.161566	0
STK11	AC007787.2	0.169924	0
TBK1	AC007787.2	0.18923	0
TSC1	AC007787.2	0.445792	0
TSC2	AC007787.2	0.324653	0
ULK1	AC007787.2	0.332814	0
ULK3	AC007787.2	0.214977	0
VEGFA	AC007787.2	0.287361	0
WDFY3	AC007787.2	0.278549	0
ZFYVE1	AC007787.2	0.199975	0
ATG16L2	AC008731.1	0.373488	0
ATG2B	AC008731.1	0.182693	0
ATG4A	AC008731.1	-0.181832	0
ATG4B	AC008731.1	0.157511	0
ATG5	AC008731.1	-0.154332	0
ATG7	AC008731.1	-0.1528	0
ATG9B	AC008731.1	0.153986	0
BAG1	AC008731.1	-0.157131	0
BAK1	AC008731.1	-0.178366	0
BID	AC008731.1	-0.2406	0
BIRC5	AC008731.1	-0.144186	0
BNIP1	AC008731.1	-0.268477	0
BNIP3	AC008731.1	-0.161958	0
CAPN10	AC008731.1	0.197296	0
CASP4	AC008731.1	-0.14484	0
CASP8	AC008731.1	0.151867	0
CFLAR	AC008731.1	0.313493	0
CTSD	AC008731.1	-0.186619	0
DNAJB9	AC008731.1	-0.168511	0
EEF2K	AC008731.1	0.178657	0
FADD	AC008731.1	-0.264161	0
GABARAP	AC008731.1	-0.201223	0
GABARAPL2	AC008731.1	-0.173088	0
GAPDH	AC008731.1	-0.185562	0
GOPC	AC008731.1	0.203801	0
HDAC6	AC008731.1	0.194089	0
HSPA8	AC008731.1	-0.277609	0
KLHL24	AC008731.1	0.157449	0
MAP2K7	AC008731.1	0.188324	0
MAPK8	AC008731.1	0.193834	0
PEA15	AC008731.1	-0.148825	0
PEX3	AC008731.1	-0.166427	0
RAB1A	AC008731.1	-0.145365	0
RAB24	AC008731.1	0.222422	0
RELA	AC008731.1	-0.200688	0
RGS19	AC008731.1	-0.152798	0
RPS6KB1	AC008731.1	0.14918	0
SERPINA1	AC008731.1	-0.144055	0
SIRT1	AC008731.1	0.14584	0
SQSTM1	AC008731.1	-0.150309	0
TSC1	AC008731.1	0.28498	0
TSC2	AC008731.1	0.158807	0
VEGFA	AC008731.1	0.2554	0
WDFY3	AC008731.1	0.183539	0
ATG12	AC008937.3	0.148098	0
ATG4D	AC008937.3	0.182691	0
ATG7	AC008937.3	-0.208599	0
BAX	AC008937.3	-0.145104	0
CLN3	AC008937.3	-0.164755	0
CTSD	AC008937.3	-0.150496	0
KLHL24	AC008937.3	0.160963	0
NRG1	AC008937.3	0.199258	0
PEA15	AC008937.3	-0.182858	0
PRKAR1A	AC008937.3	0.153833	0
RAB33B	AC008937.3	0.227188	0
RGS19	AC008937.3	-0.148695	0
RPS6KB1	AC008937.3	0.252456	0
SIRT2	AC008937.3	-0.206022	0
ATG16L2	AC009061.1	0.326058	0
BECN1	AC009061.1	0.147856	0
CAMKK2	AC009061.1	0.167018	0
CAPN10	AC009061.1	0.162511	0
CASP4	AC009061.1	-0.148989	0
CFLAR	AC009061.1	0.155962	0
EEF2K	AC009061.1	0.279811	0
EIF4G1	AC009061.1	0.157128	0
FAS	AC009061.1	-0.151218	0
GOPC	AC009061.1	0.149589	0
HDAC6	AC009061.1	0.151469	0
IKBKB	AC009061.1	0.221224	0
MAPK8IP1	AC009061.1	0.163412	0
MLST8	AC009061.1	0.193983	0
MTOR	AC009061.1	0.15303	0
NRG3	AC009061.1	0.215248	0
PARP1	AC009061.1	0.184143	0
PRKAB1	AC009061.1	0.158674	0
PRKCD	AC009061.1	0.242377	0
PRKCQ	AC009061.1	0.20203	0
SIRT1	AC009061.1	0.206158	0
SPNS1	AC009061.1	0.244023	0
STK11	AC009061.1	0.17247	0
TSC1	AC009061.1	0.16889	0
TSC2	AC009061.1	0.30294	0
ULK1	AC009061.1	0.183953	0
ULK3	AC009061.1	0.252036	0
USP10	AC009061.1	0.228979	0
ARNT	AC009093.1	0.158931	0
ARSA	AC009093.1	0.146121	0
ARSB	AC009093.1	0.539148	0
ATG12	AC009093.1	0.154951	0
ATG2B	AC009093.1	0.269736	0
ATG3	AC009093.1	-0.148994	0
BAG3	AC009093.1	0.153034	0
BECN1	AC009093.1	0.218396	0
BIRC5	AC009093.1	-0.151025	0
CAPN2	AC009093.1	0.166664	0
CDKN1A	AC009093.1	0.267465	0
CDKN2A	AC009093.1	-0.203478	0
CHMP4B	AC009093.1	-0.155884	0
DAPK1	AC009093.1	0.198677	0
DDIT3	AC009093.1	-0.167351	0
DLC1	AC009093.1	0.374635	0
DRAM1	AC009093.1	0.395331	0
EDEM1	AC009093.1	0.297378	0
EGFR	AC009093.1	0.244648	0
ERN1	AC009093.1	0.30137	0
FAS	AC009093.1	0.323628	0
FOS	AC009093.1	0.14737	0
FOXO1	AC009093.1	0.260242	0
GAA	AC009093.1	0.204381	0
GABARAP	AC009093.1	-0.175502	0
GABARAPL2	AC009093.1	-0.155177	0
GAPDH	AC009093.1	-0.16459	0
GOPC	AC009093.1	0.199085	0
HDAC1	AC009093.1	-0.156693	0
HIF1A	AC009093.1	0.219925	0
IFNG	AC009093.1	0.148076	0
IL24	AC009093.1	0.151802	0
ITGB1	AC009093.1	0.328653	0
ITGB4	AC009093.1	0.173691	0
MTOR	AC009093.1	0.161407	0
NBR1	AC009093.1	0.226809	0
NKX2-3	AC009093.1	0.332954	0
NLRC4	AC009093.1	0.238711	0
NPC1	AC009093.1	0.174545	0
PEX3	AC009093.1	-0.144865	0
PPP1R15A	AC009093.1	0.25365	0
PRKAR1A	AC009093.1	0.191537	0
PRKCD	AC009093.1	-0.144272	0
PTEN	AC009093.1	0.179132	0
RAB11A	AC009093.1	-0.216475	0
RB1	AC009093.1	0.172662	0
RHEB	AC009093.1	-0.224464	0
RPTOR	AC009093.1	0.172032	0
SH3GLB1	AC009093.1	0.249344	0
SPHK1	AC009093.1	0.570086	0
SPNS1	AC009093.1	0.19043	0
TP53INP2	AC009093.1	0.263429	0
TSC1	AC009093.1	0.232175	0
ULK1	AC009093.1	0.14855	0
ULK2	AC009093.1	0.177368	0
WDFY3	AC009093.1	0.195478	0
WIPI1	AC009093.1	0.38596	0
ZFYVE1	AC009093.1	0.269172	0
ARSB	AC009120.5	-0.160614	0
ATG16L2	AC009120.5	0.298845	0
ATG4A	AC009120.5	-0.158592	0
ATG4B	AC009120.5	0.209559	0
ATG9B	AC009120.5	0.195553	0
BAG1	AC009120.5	-0.190509	0
BAG3	AC009120.5	-0.20201	0
BAK1	AC009120.5	-0.247866	0
BCL2	AC009120.5	0.192066	0
BID	AC009120.5	-0.18494	0
CAPN1	AC009120.5	-0.160492	0
CAPN10	AC009120.5	0.257225	0
CASP1	AC009120.5	-0.145642	0
CFLAR	AC009120.5	0.175186	0
CTSD	AC009120.5	-0.252467	0
DNAJB9	AC009120.5	-0.15641	0
DRAM1	AC009120.5	-0.187471	0
FADD	AC009120.5	-0.171716	0
GABARAPL2	AC009120.5	0.157562	0
GOPC	AC009120.5	0.275423	0
GRID2	AC009120.5	0.170851	0
HDAC6	AC009120.5	0.152982	0
HSP90AB1	AC009120.5	0.163627	0
HSPA8	AC009120.5	-0.175298	0
ITPR1	AC009120.5	0.249144	0
KLHL24	AC009120.5	0.167677	0
MAP2K7	AC009120.5	0.146852	0
MAPK8	AC009120.5	0.262934	0
MAPK8IP1	AC009120.5	0.156553	0
NFKB1	AC009120.5	-0.146189	0
PINK1	AC009120.5	-0.177983	0
RAB1A	AC009120.5	-0.154107	0
RAB24	AC009120.5	0.202392	0
RELA	AC009120.5	-0.186501	0
SESN2	AC009120.5	-0.149303	0
SH3GLB1	AC009120.5	-0.190603	0
SIRT1	AC009120.5	0.154369	0
TP73	AC009120.5	0.186307	0
TSC1	AC009120.5	0.250969	0
TSC2	AC009120.5	0.231002	0
USP10	AC009120.5	0.309702	0
VAMP7	AC009120.5	-0.163883	0
WIPI1	AC009120.5	-0.166599	0
ARSA	AC009299.2	0.150062	0
ARSB	AC009299.2	0.199941	0
ATG2A	AC009299.2	0.232765	0
ATG2B	AC009299.2	0.147348	0
ATG9A	AC009299.2	0.201678	0
BCL2L1	AC009299.2	0.158987	0
BECN1	AC009299.2	0.222439	0
BIRC5	AC009299.2	0.146165	0
CAPN1	AC009299.2	0.168857	0
DAPK1	AC009299.2	0.163529	0
DIRAS3	AC009299.2	0.146423	0
EDEM1	AC009299.2	0.233184	0
EIF4G1	AC009299.2	0.174748	0
ERN1	AC009299.2	0.185101	0
FADD	AC009299.2	0.19077	0
GAA	AC009299.2	0.2778	0
HDAC6	AC009299.2	0.16046	0
HGS	AC009299.2	0.230452	0
HIF1A	AC009299.2	0.19305	0
HSPA5	AC009299.2	0.301958	0
HSPA8	AC009299.2	0.289331	0
ITGA3	AC009299.2	0.185974	0
ITGA6	AC009299.2	0.230855	0
ITGB1	AC009299.2	0.207809	0
ITGB4	AC009299.2	0.227128	0
LAMP1	AC009299.2	0.169381	0
MAPK1	AC009299.2	0.174278	0
MAPK9	AC009299.2	0.188473	0
MBTPS2	AC009299.2	0.266651	0
MTOR	AC009299.2	0.171815	0
NBR1	AC009299.2	0.199414	0
NCKAP1	AC009299.2	0.154311	0
NPC1	AC009299.2	0.154371	0
P4HB	AC009299.2	0.275746	0
PIK3C3	AC009299.2	0.237181	0
PINK1	AC009299.2	0.20198	0
PRKAR1A	AC009299.2	0.292739	0
RAB5A	AC009299.2	0.146821	0
RPS6KB1	AC009299.2	0.205165	0
RPTOR	AC009299.2	0.393144	0
SESN2	AC009299.2	0.156252	0
SPNS1	AC009299.2	0.248463	0
TM9SF1	AC009299.2	0.272828	0
TP53INP2	AC009299.2	0.174785	0
TSC1	AC009299.2	0.189419	0
WDFY3	AC009299.2	0.196251	0
WIPI1	AC009299.2	0.282944	0
ZFYVE1	AC009299.2	0.269114	0
ARSB	AC009495.3	-0.157584	0
ATG16L1	AC009495.3	0.252816	0
ATG16L2	AC009495.3	0.177138	0
ATG4B	AC009495.3	0.197483	0
ATG9A	AC009495.3	0.189459	0
BAG3	AC009495.3	-0.181288	0
BAX	AC009495.3	-0.231515	0
BECN1	AC009495.3	0.146066	0
CAMKK2	AC009495.3	0.183115	0
CAPN10	AC009495.3	0.21733	0
CASP8	AC009495.3	0.314737	0
CD46	AC009495.3	0.247784	0
CFLAR	AC009495.3	0.274253	0
DRAM1	AC009495.3	-0.162057	0
EIF2AK2	AC009495.3	0.165169	0
EIF4EBP1	AC009495.3	-0.152557	0
ERBB2	AC009495.3	0.167684	0
GAPDH	AC009495.3	-0.167216	0
GOPC	AC009495.3	0.163067	0
HDAC6	AC009495.3	0.190262	0
MTOR	AC009495.3	0.198862	0
PEX14	AC009495.3	0.145132	0
PINK1	AC009495.3	0.179142	0
PRKAB1	AC009495.3	0.147847	0
PRKCD	AC009495.3	0.174427	0
PRKCQ	AC009495.3	0.15433	0
SPHK1	AC009495.3	-0.163604	0
TP73	AC009495.3	0.192953	0
TSC2	AC009495.3	0.162474	0
ULK1	AC009495.3	0.156834	0
UVRAG	AC009495.3	0.165669	0
WIPI2	AC009495.3	0.223961	0
APOL1	AC009506.1	-0.224553	0
ATF6	AC009506.1	0.287812	0
ATG16L1	AC009506.1	0.201286	0
ATG5	AC009506.1	0.171632	0
ATG7	AC009506.1	-0.168239	0
ATIC	AC009506.1	0.165157	0
BAG1	AC009506.1	-0.214091	0
BAG3	AC009506.1	-0.243558	0
BAK1	AC009506.1	-0.213772	0
CASP1	AC009506.1	-0.175529	0
CASP8	AC009506.1	0.244993	0
CCL2	AC009506.1	-0.162198	0
CDKN1B	AC009506.1	0.179842	0
CTSB	AC009506.1	-0.213418	0
CTSD	AC009506.1	-0.178937	0
CX3CL1	AC009506.1	-0.14414	0
DAPK2	AC009506.1	-0.158443	0
DIRAS3	AC009506.1	0.21896	0
DRAM1	AC009506.1	-0.209813	0
EDEM1	AC009506.1	-0.180254	0
EIF2AK3	AC009506.1	0.185319	0
FKBP1A	AC009506.1	0.203351	0
FKBP1B	AC009506.1	0.152595	0
GABARAP	AC009506.1	0.158011	0
GABARAPL2	AC009506.1	0.155863	0
GOPC	AC009506.1	0.147612	0
GRID2	AC009506.1	0.196188	0
HDAC6	AC009506.1	0.168825	0
IFNG	AC009506.1	-0.159882	0
IKBKE	AC009506.1	-0.216766	0
ITGA6	AC009506.1	0.251693	0
ITGB4	AC009506.1	-0.166595	0
LAMP1	AC009506.1	0.148346	0
MAP1LC3B	AC009506.1	0.327127	0
MAPK8	AC009506.1	0.179302	0
NCKAP1	AC009506.1	0.202369	0
NFE2L2	AC009506.1	0.224891	0
NFKB1	AC009506.1	-0.158926	0
NLRC4	AC009506.1	-0.158147	0
PIK3C3	AC009506.1	0.181291	0
PRKAB1	AC009506.1	0.162925	0
RELA	AC009506.1	-0.154926	0
SPHK1	AC009506.1	-0.176648	0
SQSTM1	AC009506.1	-0.153216	0
USP10	AC009506.1	0.27949	0
WIPI2	AC009506.1	0.266871	0
ATG7	AC010148.1	-0.194868	0
CASP1	AC010148.1	-0.19937	0
CASP3	AC010148.1	0.145761	0
CCL2	AC010148.1	-0.155308	0
DAPK1	AC010148.1	0.175265	0
DIRAS3	AC010148.1	0.160126	0
FAS	AC010148.1	-0.179979	0
FKBP1B	AC010148.1	0.191624	0
HDAC6	AC010148.1	0.226551	0
IKBKE	AC010148.1	-0.149677	0
IL24	AC010148.1	-0.147273	0
ITGA6	AC010148.1	0.234822	0
MAPK1	AC010148.1	0.163629	0
NCKAP1	AC010148.1	0.171467	0
PARP1	AC010148.1	0.164106	0
PELP1	AC010148.1	0.162737	0
RB1CC1	AC010148.1	0.191104	0
SH3GLB1	AC010148.1	-0.169767	0
SQSTM1	AC010148.1	-0.1783	0
TM9SF1	AC010148.1	0.145525	0
TP63	AC010148.1	0.148345	0
TP73	AC010148.1	0.198176	0
ATG16L2	AC010336.1	0.308692	0
ATG4D	AC010336.1	0.221559	0
BAG3	AC010336.1	-0.169484	0
BIRC5	AC010336.1	0.157538	0
CAPN10	AC010336.1	0.152746	0
CASP1	AC010336.1	-0.171503	0
CTSD	AC010336.1	-0.159301	0
DRAM1	AC010336.1	-0.181123	0
EGFR	AC010336.1	-0.144393	0
FAS	AC010336.1	-0.252553	0
FKBP1B	AC010336.1	0.173351	0
HGS	AC010336.1	0.211794	0
HSP90AB1	AC010336.1	0.145805	0
ITGA6	AC010336.1	0.151371	0
MAP2K7	AC010336.1	0.578118	0
MAPK8IP1	AC010336.1	0.210985	0
NAF1	AC010336.1	0.146959	0
NFKB1	AC010336.1	-0.192848	0
PEX14	AC010336.1	0.176786	0
PTEN	AC010336.1	-0.173354	0
RPTOR	AC010336.1	0.204552	0
SERPINA1	AC010336.1	-0.149491	0
SH3GLB1	AC010336.1	-0.251389	0
SPNS1	AC010336.1	0.184939	0
TMEM74	AC010336.1	0.159851	0
TP73	AC010336.1	0.186061	0
TSC1	AC010336.1	0.158303	0
AMBRA1	AC010468.1	-0.186316	0
APOL1	AC010468.1	-0.147963	0
ARNT	AC010468.1	-0.211471	0
ARSB	AC010468.1	-0.168136	0
ATF4	AC010468.1	0.14766	0
ATF6	AC010468.1	-0.178935	0
ATG10	AC010468.1	0.189525	0
ATG12	AC010468.1	0.19509	0
ATG16L2	AC010468.1	-0.187451	0
ATG2A	AC010468.1	-0.347368	0
ATG2B	AC010468.1	-0.344244	0
ATG5	AC010468.1	0.270487	0
ATG9A	AC010468.1	-0.269103	0
BAG3	AC010468.1	-0.204096	0
BECN1	AC010468.1	-0.186842	0
BIRC6	AC010468.1	-0.267719	0
BNIP1	AC010468.1	0.352337	0
CAMKK2	AC010468.1	-0.22494	0
CAPN1	AC010468.1	-0.223676	0
CASP4	AC010468.1	0.166	0
CASP8	AC010468.1	-0.217836	0
CFLAR	AC010468.1	-0.342924	0
DAPK1	AC010468.1	-0.18104	0
DAPK2	AC010468.1	-0.154838	0
DNAJB9	AC010468.1	0.256198	0
EDEM1	AC010468.1	-0.294804	0
EEF2K	AC010468.1	-0.292092	0
EGFR	AC010468.1	-0.18066	0
EIF2AK2	AC010468.1	-0.302909	0
EIF2AK3	AC010468.1	-0.174943	0
EIF4EBP1	AC010468.1	0.219227	0
EIF4G1	AC010468.1	-0.364393	0
ERN1	AC010468.1	-0.299174	0
FKBP1B	AC010468.1	0.233013	0
FOXO3	AC010468.1	-0.212772	0
GAA	AC010468.1	-0.155691	0
GABARAP	AC010468.1	0.17112	0
GABARAPL2	AC010468.1	0.393589	0
GAPDH	AC010468.1	0.188466	0
HDAC6	AC010468.1	-0.19135	0
HGS	AC010468.1	-0.250244	0
HIF1A	AC010468.1	-0.235909	0
HSPA5	AC010468.1	-0.217672	0
IKBKB	AC010468.1	-0.170957	0
IKBKE	AC010468.1	-0.166103	0
ITGA6	AC010468.1	-0.168576	0
ITGB1	AC010468.1	-0.21682	0
KIF5B	AC010468.1	-0.162986	0
LAMP1	AC010468.1	-0.207435	0
MAP2K7	AC010468.1	-0.188313	0
MAPK1	AC010468.1	-0.168816	0
MBTPS2	AC010468.1	-0.193597	0
MLST8	AC010468.1	0.256128	0
MTOR	AC010468.1	-0.327909	0
NBR1	AC010468.1	-0.185726	0
NCKAP1	AC010468.1	-0.272787	0
NFE2L2	AC010468.1	-0.171755	0
NFKB1	AC010468.1	-0.189439	0
NPC1	AC010468.1	-0.162266	0
P4HB	AC010468.1	-0.195408	0
PARP1	AC010468.1	-0.181547	0
PELP1	AC010468.1	-0.19816	0
PIK3R4	AC010468.1	-0.25533	0
PINK1	AC010468.1	-0.21086	0
PRKAR1A	AC010468.1	-0.177257	0
PRKCD	AC010468.1	-0.239459	0
RAB33B	AC010468.1	0.229188	0
RAB5A	AC010468.1	-0.268436	0
RAB7A	AC010468.1	-0.200837	0
RAF1	AC010468.1	-0.179223	0
RB1CC1	AC010468.1	-0.170062	0
RELA	AC010468.1	-0.172591	0
RPS6KB1	AC010468.1	-0.199675	0
RPTOR	AC010468.1	-0.261051	0
SESN2	AC010468.1	-0.223018	0
SH3GLB1	AC010468.1	-0.196876	0
SPNS1	AC010468.1	-0.184133	0
ST13	AC010468.1	0.145575	0
STK11	AC010468.1	-0.242574	0
TBK1	AC010468.1	-0.264621	0
TM9SF1	AC010468.1	-0.179968	0
TMEM74	AC010468.1	0.180189	0
TP53INP2	AC010468.1	-0.283206	0
TSC1	AC010468.1	-0.286869	0
ULK1	AC010468.1	-0.242014	0
VEGFA	AC010468.1	-0.194692	0
WDFY3	AC010468.1	-0.265623	0
WIPI1	AC010468.1	-0.204827	0
WIPI2	AC010468.1	-0.170403	0
ZFYVE1	AC010468.1	-0.320561	0
APOL1	AC010884.1	-0.159463	0
ATG10	AC010884.1	0.165709	0
ATIC	AC010884.1	0.166408	0
BAX	AC010884.1	-0.159348	0
CASP4	AC010884.1	-0.161813	0
CHMP4B	AC010884.1	-0.201937	0
DRAM1	AC010884.1	-0.186255	0
GOPC	AC010884.1	0.162161	0
GRID2	AC010884.1	0.144078	0
HDAC1	AC010884.1	0.193436	0
HSP90AB1	AC010884.1	0.191412	0
ITPR1	AC010884.1	0.20468	0
MAP1LC3C	AC010884.1	0.208479	0
MBTPS2	AC010884.1	0.170783	0
MLST8	AC010884.1	0.200247	0
PARP1	AC010884.1	0.161126	0
PRKAB1	AC010884.1	0.162212	0
TSC2	AC010884.1	0.181368	0
WIPI2	AC010884.1	0.187971	0
CAPN2	AC010894.3	-0.144412	0
CAPNS1	AC010894.3	0.21781	0
CDKN2A	AC010894.3	0.157839	0
EEF2	AC010894.3	-0.183824	0
IFNG	AC010894.3	0.173212	0
ITGB4	AC010894.3	-0.164884	0
PEX3	AC010894.3	0.169232	0
PTEN	AC010894.3	-0.175797	0
RAB33B	AC010894.3	0.195353	0
RB1CC1	AC010894.3	0.212782	0
RHEB	AC010894.3	0.179127	0
ATG2B	AC010976.2	0.147049	0
FOXO1	AC010976.2	0.149052	0
MAP2K7	AC010976.2	0.150854	0
NRG3	AC010976.2	0.188053	0
ARSA	AC011498.1	0.187792	0
ATG16L2	AC011498.1	0.219666	0
CAPN10	AC011498.1	0.154173	0
CFLAR	AC011498.1	0.203825	0
IKBKB	AC011498.1	0.150404	0
KLHL24	AC011498.1	0.181044	0
MAP2K7	AC011498.1	0.187347	0
PELP1	AC011498.1	0.165337	0
RAB24	AC011498.1	0.248009	0
STK11	AC011498.1	0.181976	0
TSC1	AC011498.1	0.157607	0
ULK2	AC011498.1	0.20117	0
UVRAG	AC011498.1	0.178443	0
CAPN10	AC011755.1	0.144311	0
EIF4EBP1	AC011755.1	0.14468	0
RGS19	AC011755.1	0.193621	0
ATF6	AC011933.2	-0.189217	0
ATG16L2	AC011933.2	0.446204	0
ATG2B	AC011933.2	0.146241	0
ATG3	AC011933.2	-0.149694	0
ATG4B	AC011933.2	0.283124	0
ATG5	AC011933.2	-0.154103	0
BCL2	AC011933.2	0.219269	0
BID	AC011933.2	-0.169992	0
BNIP1	AC011933.2	-0.17481	0
BNIP3	AC011933.2	-0.170787	0
CAPN10	AC011933.2	0.371083	0
CFLAR	AC011933.2	0.269535	0
DLC1	AC011933.2	0.16881	0
DNAJB9	AC011933.2	-0.152979	0
ERN1	AC011933.2	0.260923	0
FADD	AC011933.2	-0.156994	0
FOS	AC011933.2	0.164418	0
GABARAP	AC011933.2	-0.206606	0
GABARAPL2	AC011933.2	-0.16943	0
GAPDH	AC011933.2	-0.188761	0
GOPC	AC011933.2	0.167502	0
HDAC6	AC011933.2	0.159511	0
HGS	AC011933.2	0.321772	0
HSPA8	AC011933.2	-0.177841	0
IKBKB	AC011933.2	0.175834	0
ITPR1	AC011933.2	0.200223	0
LAMP2	AC011933.2	-0.17496	0
MAP1LC3B	AC011933.2	-0.205359	0
MAP2K7	AC011933.2	0.261054	0
MLST8	AC011933.2	-0.148681	0
PEA15	AC011933.2	-0.159839	0
PEX14	AC011933.2	0.17329	0
PPP1R15A	AC011933.2	0.240088	0
PRKAR1A	AC011933.2	0.170439	0
RAB1A	AC011933.2	-0.184232	0
RAB24	AC011933.2	0.1923	0
RPS6KB1	AC011933.2	0.253953	0
RPTOR	AC011933.2	0.200041	0
SPHK1	AC011933.2	0.146068	0
ST13	AC011933.2	-0.208673	0
STK11	AC011933.2	0.216411	0
TSC1	AC011933.2	0.3504	0
ULK1	AC011933.2	0.205505	0
ULK3	AC011933.2	0.220365	0
VEGFA	AC011933.2	0.239778	0
WDFY3	AC011933.2	0.184698	0
ARSB	AC012123.1	-0.185994	0
ATG16L2	AC012123.1	0.218401	0
ATG4A	AC012123.1	-0.176721	0
ATG7	AC012123.1	-0.167037	0
BAG1	AC012123.1	-0.147158	0
BAG3	AC012123.1	-0.211946	0
BCL2L1	AC012123.1	0.178775	0
CAPN10	AC012123.1	0.152645	0
CASP8	AC012123.1	0.182841	0
CTSB	AC012123.1	-0.15228	0
CX3CL1	AC012123.1	-0.162223	0
DRAM1	AC012123.1	-0.202513	0
FAS	AC012123.1	-0.157089	0
FKBP1A	AC012123.1	0.164279	0
GNAI3	AC012123.1	-0.176679	0
GOPC	AC012123.1	0.171657	0
GRID2	AC012123.1	0.206891	0
HSPA5	AC012123.1	-0.166512	0
HSPA8	AC012123.1	-0.212458	0
HSPB8	AC012123.1	-0.158288	0
ITGB1	AC012123.1	-0.155178	0
NFKB1	AC012123.1	-0.149849	0
NLRC4	AC012123.1	-0.155575	0
P4HB	AC012123.1	-0.158792	0
RAB11A	AC012123.1	-0.148912	0
RAB24	AC012123.1	0.287552	0
SERPINA1	AC012123.1	-0.147107	0
SESN2	AC012123.1	-0.194995	0
SH3GLB1	AC012123.1	-0.218049	0
SPHK1	AC012123.1	-0.197367	0
VAMP7	AC012123.1	-0.196465	0
ATG16L2	AC012313.1	0.275322	0
ATG2A	AC012313.1	0.282757	0
ATG2B	AC012313.1	0.262473	0
ATG4B	AC012313.1	0.165871	0
ATG5	AC012313.1	-0.174993	0
BECN1	AC012313.1	0.175244	0
BNIP1	AC012313.1	-0.243624	0
CAMKK2	AC012313.1	0.257111	0
CAPN2	AC012313.1	0.150914	0
CASP4	AC012313.1	-0.189123	0
CFLAR	AC012313.1	0.156893	0
DAPK1	AC012313.1	0.16283	0
DDIT3	AC012313.1	-0.173639	0
EDEM1	AC012313.1	0.160778	0
EEF2K	AC012313.1	0.292539	0
EIF4G1	AC012313.1	0.219262	0
GAA	AC012313.1	0.190976	0
GABARAP	AC012313.1	-0.175135	0
GABARAPL2	AC012313.1	-0.154023	0
GRID2	AC012313.1	0.152873	0
HDAC6	AC012313.1	0.23071	0
HGS	AC012313.1	0.208062	0
HIF1A	AC012313.1	0.150401	0
IKBKB	AC012313.1	0.146723	0
MAPK1	AC012313.1	0.243025	0
MBTPS2	AC012313.1	0.157264	0
MTOR	AC012313.1	0.234043	0
MYC	AC012313.1	0.249618	0
NAF1	AC012313.1	0.177279	0
PRKCD	AC012313.1	0.247613	0
RAC1	AC012313.1	-0.164528	0
RAF1	AC012313.1	0.15435	0
RGS19	AC012313.1	-0.160706	0
RPTOR	AC012313.1	0.27538	0
SIRT2	AC012313.1	0.220117	0
SPNS1	AC012313.1	0.313572	0
STK11	AC012313.1	0.202084	0
TSC1	AC012313.1	0.321808	0
TSC2	AC012313.1	0.21687	0
ULK1	AC012313.1	0.180187	0
ULK3	AC012313.1	0.161482	0
VEGFA	AC012313.1	0.152862	0
ZFYVE1	AC012313.1	0.256093	0
ATG10	AC012368.1	0.165904	0
ATG16L2	AC012368.1	0.354064	0
ATG4B	AC012368.1	0.261586	0
CAPN10	AC012368.1	0.218915	0
EEF2	AC012368.1	-0.202281	0
EGFR	AC012368.1	0.148239	0
EIF4EBP1	AC012368.1	0.169994	0
FOXO1	AC012368.1	-0.157358	0
PEX14	AC012368.1	0.208201	0
RAB24	AC012368.1	0.156256	0
TMEM74	AC012368.1	0.36169	0
TSC1	AC012368.1	0.150914	0
ULK3	AC012368.1	0.182492	0
ARSB	AC015726.1	-0.16251	0
ATG16L2	AC015726.1	0.269229	0
ATG4B	AC015726.1	0.177281	0
ATG7	AC015726.1	-0.193222	0
BAK1	AC015726.1	-0.179031	0
CAPN10	AC015726.1	0.231165	0
CFLAR	AC015726.1	0.161175	0
DNAJB1	AC015726.1	0.231414	0
EIF2S1	AC015726.1	-0.153762	0
FADD	AC015726.1	-0.157722	0
GOPC	AC015726.1	0.165996	0
HSPA8	AC015726.1	-0.256051	0
IKBKB	AC015726.1	0.195622	0
MAP1LC3B	AC015726.1	-0.151064	0
MAP2K7	AC015726.1	0.168513	0
MBTPS2	AC015726.1	-0.172506	0
P4HB	AC015726.1	-0.182916	0
PELP1	AC015726.1	0.157443	0
RAB1A	AC015726.1	-0.151232	0
RAB24	AC015726.1	0.144443	0
RELA	AC015726.1	-0.152858	0
SAR1A	AC015726.1	-0.161269	0
SERPINA1	AC015726.1	-0.156366	0
TSC1	AC015726.1	0.196677	0
ULK2	AC015726.1	0.351187	0
ULK3	AC015726.1	0.170486	0
ARSA	AC016586.1	0.15192	0
ATG4D	AC016586.1	0.14713	0
BAK1	AC016586.1	0.195709	0
BAX	AC016586.1	0.218648	0
BCL2L1	AC016586.1	0.168225	0
BIRC6	AC016586.1	-0.206347	0
BNIP1	AC016586.1	0.147147	0
CAMKK2	AC016586.1	-0.154761	0
CAPN1	AC016586.1	0.16059	0
CASP8	AC016586.1	-0.17749	0
CDKN2A	AC016586.1	0.257843	0
CLN3	AC016586.1	0.310816	0
CTSB	AC016586.1	0.194371	0
CTSD	AC016586.1	0.283619	0
EEF2	AC016586.1	0.349323	0
EIF2AK2	AC016586.1	-0.212238	0
EIF2AK3	AC016586.1	-0.160166	0
FOXO3	AC016586.1	-0.187961	0
GABARAP	AC016586.1	0.233693	0
GOPC	AC016586.1	-0.204222	0
IKBKE	AC016586.1	0.146823	0
IL24	AC016586.1	0.153068	0
ITGB1	AC016586.1	-0.178711	0
KIF5B	AC016586.1	-0.176493	0
MAP1LC3A	AC016586.1	0.270769	0
MAPK3	AC016586.1	0.260003	0
MAPK8	AC016586.1	-0.244315	0
MTMR14	AC016586.1	0.166421	0
MTOR	AC016586.1	-0.156676	0
NAF1	AC016586.1	-0.158819	0
NBR1	AC016586.1	-0.159783	0
NCKAP1	AC016586.1	-0.202519	0
PIK3R4	AC016586.1	-0.151134	0
PRKAB1	AC016586.1	-0.173599	0
PTK6	AC016586.1	0.177932	0
RAB24	AC016586.1	0.159556	0
RB1CC1	AC016586.1	-0.177061	0
RELA	AC016586.1	0.220213	0
RGS19	AC016586.1	0.149526	0
SERPINA1	AC016586.1	0.172704	0
SIRT1	AC016586.1	-0.203147	0
SPHK1	AC016586.1	0.193459	0
SQSTM1	AC016586.1	0.297577	0
STK11	AC016586.1	0.458954	0
TBK1	AC016586.1	-0.169371	0
TP73	AC016586.1	-0.152841	0
ARNT	AC016722.2	0.252665	0
ATG16L2	AC016722.2	0.396921	0
ATG2A	AC016722.2	0.191969	0
ATG2B	AC016722.2	0.290482	0
ATG4B	AC016722.2	0.28768	0
ATG9A	AC016722.2	0.185569	0
ATG9B	AC016722.2	0.183404	0
BCL2	AC016722.2	0.212379	0
BID	AC016722.2	-0.20128	0
BIRC6	AC016722.2	0.38737	0
BNIP1	AC016722.2	-0.307317	0
CAMKK2	AC016722.2	0.22339	0
CAPN10	AC016722.2	0.336187	0
CASP1	AC016722.2	-0.155034	0
CASP4	AC016722.2	-0.209493	0
CFLAR	AC016722.2	0.28819	0
CLN3	AC016722.2	-0.215137	0
CTSD	AC016722.2	-0.174824	0
DAPK1	AC016722.2	0.210486	0
EDEM1	AC016722.2	0.16715	0
EEF2K	AC016722.2	0.193181	0
EIF2AK2	AC016722.2	0.25748	0
EIF2AK3	AC016722.2	0.23543	0
EIF4EBP1	AC016722.2	-0.148186	0
EIF4G1	AC016722.2	0.17955	0
ERN1	AC016722.2	0.270432	0
FADD	AC016722.2	-0.148344	0
FOXO3	AC016722.2	0.184334	0
GABARAP	AC016722.2	-0.275657	0
GABARAPL2	AC016722.2	-0.233972	0
GAPDH	AC016722.2	-0.201507	0
GOPC	AC016722.2	0.347179	0
GRID2	AC016722.2	0.160697	0
HDAC6	AC016722.2	0.206619	0
HGS	AC016722.2	0.206221	0
HSP90AB1	AC016722.2	0.15294	0
IKBKB	AC016722.2	0.214199	0
ITGB1	AC016722.2	0.158642	0
KIF5B	AC016722.2	0.211605	0
KLHL24	AC016722.2	0.191889	0
MAP1LC3A	AC016722.2	-0.160824	0
MAP2K7	AC016722.2	0.213251	0
MAPK3	AC016722.2	-0.1807	0
MAPK8	AC016722.2	0.25676	0
MAPK8IP1	AC016722.2	0.164538	0
MTOR	AC016722.2	0.2467	0
NBR1	AC016722.2	0.17546	0
NFE2L2	AC016722.2	0.159054	0
PARP1	AC016722.2	0.187836	0
PEA15	AC016722.2	-0.148992	0
PELP1	AC016722.2	0.187548	0
PIK3C3	AC016722.2	0.177432	0
PIK3R4	AC016722.2	0.233737	0
PRKAB1	AC016722.2	0.160428	0
PRKAR1A	AC016722.2	0.157324	0
RAB5A	AC016722.2	0.146195	0
RAF1	AC016722.2	0.232352	0
RPS6KB1	AC016722.2	0.212638	0
RPTOR	AC016722.2	0.206369	0
SIRT1	AC016722.2	0.250109	0
SPNS1	AC016722.2	0.164343	0
SQSTM1	AC016722.2	-0.231463	0
TBK1	AC016722.2	0.207993	0
TP73	AC016722.2	0.148969	0
TSC1	AC016722.2	0.38909	0
TSC2	AC016722.2	0.2387	0
ULK1	AC016722.2	0.285539	0
ULK3	AC016722.2	0.16337	0
VEGFA	AC016722.2	0.369945	0
WDFY3	AC016722.2	0.258502	0
AMBRA1	AC016734.1	-0.185658	0
ARNT	AC016734.1	-0.3165	0
ARSB	AC016734.1	-0.238721	0
ATF6	AC016734.1	-0.273495	0
ATG10	AC016734.1	0.145625	0
ATG2A	AC016734.1	-0.156057	0
ATG2B	AC016734.1	-0.335801	0
ATG3	AC016734.1	0.159106	0
ATG4A	AC016734.1	-0.156939	0
ATG9A	AC016734.1	-0.188711	0
BCL2	AC016734.1	-0.203228	0
BECN1	AC016734.1	-0.381848	0
BIRC5	AC016734.1	0.194917	0
BIRC6	AC016734.1	-0.298899	0
BNIP1	AC016734.1	0.492532	0
CAMKK2	AC016734.1	-0.267701	0
CAPN2	AC016734.1	-0.172132	0
CASP3	AC016734.1	-0.188002	0
CASP4	AC016734.1	0.143973	0
CASP8	AC016734.1	-0.187759	0
CD46	AC016734.1	-0.216782	0
CDKN1B	AC016734.1	-0.169483	0
CDKN2A	AC016734.1	0.212408	0
CFLAR	AC016734.1	-0.301434	0
CLN3	AC016734.1	0.32835	0
DAPK1	AC016734.1	-0.23635	0
DDIT3	AC016734.1	0.293067	0
DLC1	AC016734.1	-0.144392	0
DRAM1	AC016734.1	-0.186518	0
EDEM1	AC016734.1	-0.279443	0
EEF2K	AC016734.1	-0.256417	0
EIF2AK2	AC016734.1	-0.15113	0
[truncated: 121,901 more rows]
